# Supplementary material for: Synergistic toughening of polypropylene with ultra-high molecular weight polyethylene and elastomer-olefin block copolymers
Source: Royal Society of Chemistry journal article supplement (doi:10.1039/c9ra01073d), 2019-01-01
Supplement: c9ra01073d1.pdf [file c9ra01073d1.pdf]

1 **Support information**

2 **Synergistic toughening of polypropylene with ultra-high molecular**  
3 **weight polyethylene and elastomer-olefin block copolymers**

4 Lucheng Qi<sup>1</sup>, Lei Wu<sup>1</sup>, He Ren<sup>3</sup>, Hui Cheng<sup>1</sup>, Boping Liu<sup>2</sup>, Xuelian He\*<sup>1</sup>

5 <sup>1</sup>Shanghai Key Laboratory of Multiphase Material Chemical Engineering, East China  
6 University of Science and Technology, Shanghai 200237, China

7 <sup>2</sup>College of Materials and Energy, South China Agricultural University, Guangzhou  
8 510642, China

9 <sup>3</sup>Daqing Petrochemical Research Center of PetroChina, Daqing 163714, China

10

11 **Corresponding Authors**

12 Xuelian He (E-mail: hexl@ecust.edu.cn) Tel: +86-21-64253364

13 **Author Lists:**

14 Lucheng Qi: *lcqi\_1224@foxmail.com*

15 Lei Wu: *edwood\_vip@163.com*

16 He Ren: *renhe459@petrochina.com.cn*

17 Hui Cheng: *huihyva@ecust.edu.cn*

18 Boping Liu: *boping@scau.edu.cn*

19 Xuelian He: *hexl@ecust.edu.cn*

20 Co-first author: Lei Wu

1 **Table S.1 The effect of ultrasonic irradiation on molecular weight and**  
 2 **molecular weight distribution of PP**

| Sample   | M <sub>w</sub> (kg/mol) | PDI |
|----------|-------------------------|-----|
| PP(0W)   | 410                     | 4.9 |
| PP(400W) | 390                     | 5.0 |
| PP(600W) | 380                     | 5.0 |

3

4 **Table S.2 The effect of ultrasonic irradiation on mechanical properties of PP**

| Sample   | Tensile yield strength (MPa) | Elongation at break (%) | Impact strength (23°C,kJ/m <sup>2</sup> ) |
|----------|------------------------------|-------------------------|-------------------------------------------|
| PP(0W)   | 29.5                         | 798                     | 6.1                                       |
| PP(400W) | 29.4                         | 810                     | 6.3                                       |
| PP(600W) | 29.5                         | 802                     | 6.0                                       |

5

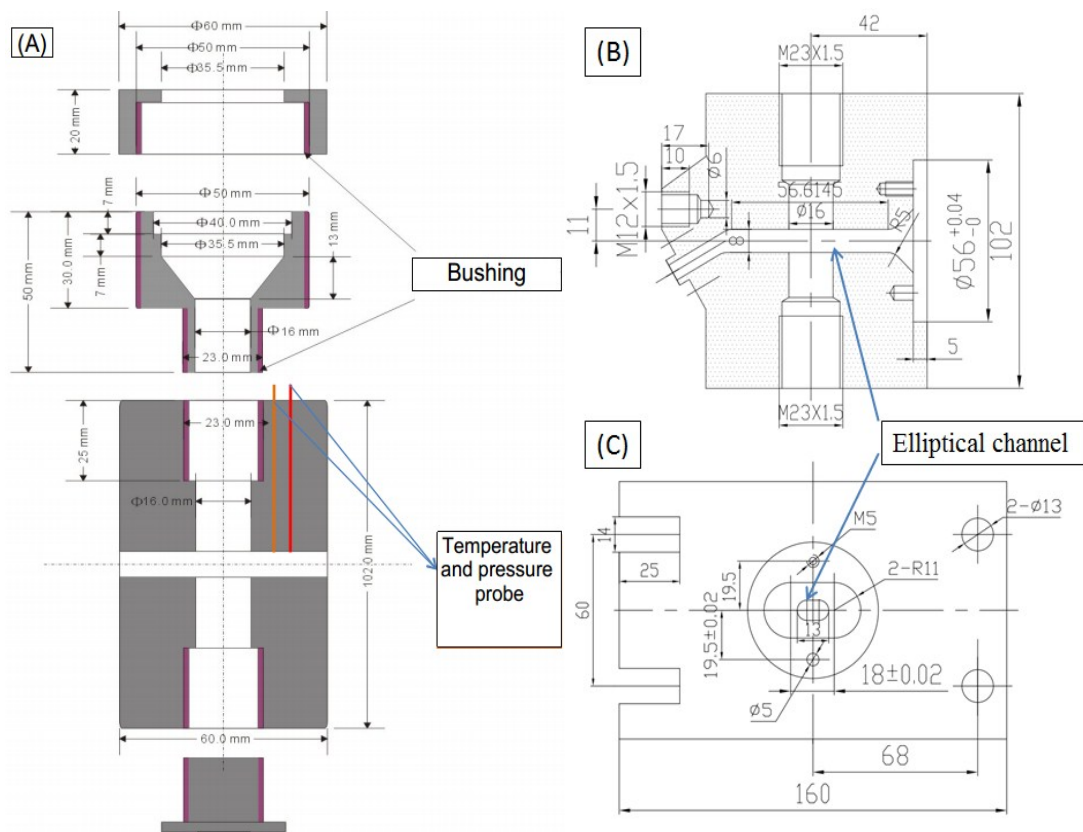

1

2

**Fig. S.1** Schematics of ultrasonic reactor (A), lateral view (B) and front view of

3

die (C).

4

5

**Table S.3** The thermodynamic property data of the blends

| Sample          | $T_m$ (°C) | $T_c$ (°C) | $X_c$ (%) |
|-----------------|------------|------------|-----------|
| PP              | 163.5      | 113.4      | 47.7      |
| P/U (99/1)      | 163.6      | 113.8      | 47.8      |
| P/O/U(99/3/1)   | 163.6      | 114.1      | 48.1      |
| P/O/U(99/6/1)   | 163.3      | 114.2      | 48.6      |
| P/O(99/6)       | 163.7      | 113.8      | 48.1      |
| P/O/U(99/6/0.5) | 163.8      | 114.0      | 48.5      |
| P/O/U(99/6/1.5) | 163.8      | 113.7      | 48.2      |
| P/O/U(99/6/2.0) | 163.4      | 113.5      | 47.5      |

6

7

8

9

1 **Table S.4** The thermodynamic property data of the blends treated by different  
2 ultrasonic power

| Sample              | T <sub>m</sub> (°C) | T <sub>c</sub> (°C) | X <sub>c</sub> (°C) |
|---------------------|---------------------|---------------------|---------------------|
| P/O/U(99/6/1.5)     | 163.8               | 113.7               | 48.2                |
| P/O/U(99/6/1.5)-200 | 163.9               | 113.9               | 48.5                |
| P/O/U(99/6/1.5)-400 | 163.8               | 114.2               | 48.6                |
| P/O/U(99/6/1.5)-600 | 163.9               | 114.6               | 49.1                |

3
